# Supplementary material for: Manipulation of 2DEG at double-doped high-entropy heterointerfaces
Source: Royal Society of Chemistry journal article supplement (doi:10.1039/d2nr01884e), 2022-01-01
Supplement: d2nr01884e1.pdf [file d2nr01884e1.pdf]

## Supporting Information

### Manipulation of 2DEG at Double-doped High-entropy Heterointerfaces

Hang Yin, Ruishu Yang, Shuanhu Wang, Kexin Jin\*

Shaanxi Key Laboratory of Condensed Matter Structures and Properties and MOE Key Laboratory of Materials Physics and Chemistry under Extraordinary Conditions, School of Physical Science and Technology, Northwestern Polytechnical University, Xi'an 710072, China.

#### Supplementary data section

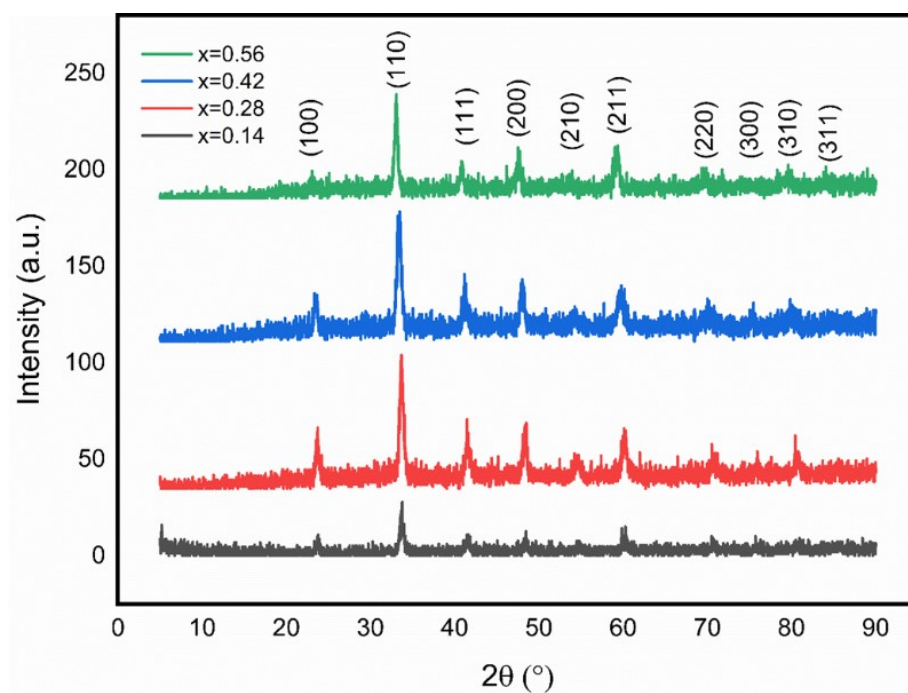

Figure S1. X-ray diffraction (XRD) result of different  $\text{Nd}_{1-x}\text{Sr}_x\text{Al}_{1-x}\text{Mn}_x\text{O}_3$  (NSAMO) targets.

For four different targets, the peak position of their XRD results keeps almost the same although with little shift with the change of doping ratio  $x$  compared with standard PDF card of  $\text{NdAlO}_3$  (NAO) (ICDD/JPCDS PDF-#29-0056). The cubic structure is maintained, and the calculated

tolerance factor ( $t$ ) are as follows:  $0.876(x=0.14)$ ,  $0.877(x=0.28)$ ,  $0.878(x=0.42)$ ,  $0.883(x=0.56)$ . These results confirm a stable crystalline structure after different levels of doping.

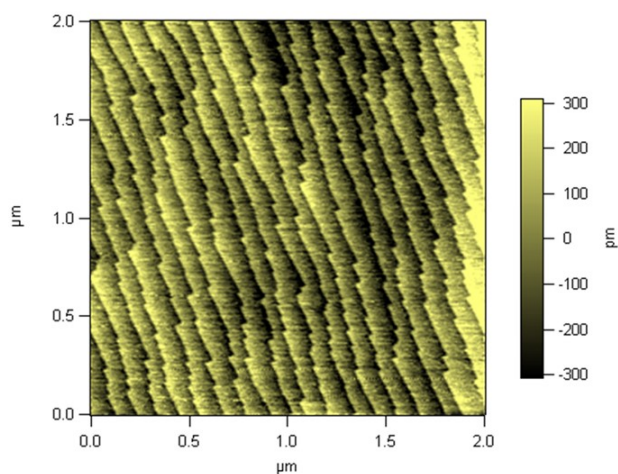

Figure S2. Atomic force microscope (AFM) image of pretreated (001) SrTiO<sub>3</sub> (STO) substrate.

Before the film growth, the (001) face STO substrate is pre-treated to get TiO<sub>2</sub> terminated surface. The flat surface and regular terraces are obtained, and its surface root-mean-square (RMS) roughness value are only 134.913 pm.

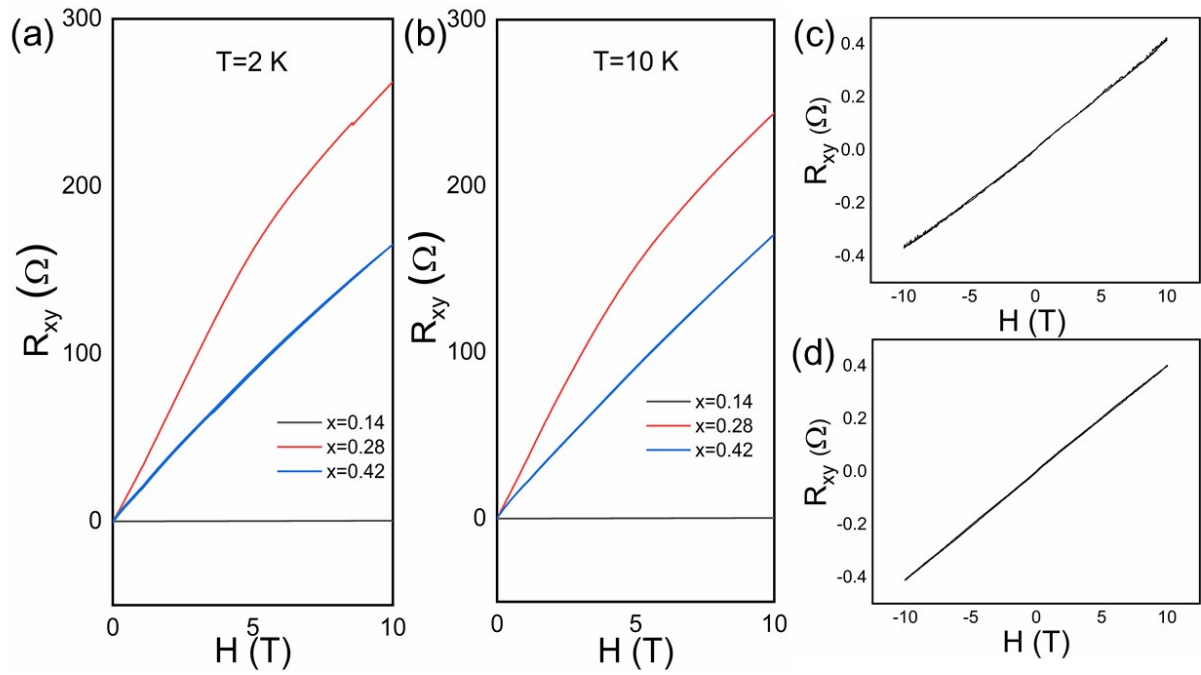

Figure S3. Hall resistance as a function of magnetic field of the sample with  $x=0.14-0.42$ , the film thickness are all 30 nm. (a) At 2 K. (b) at 10 K. Magnified Hall resistance results of  $x=0.14$  samples shown in Fig. S3a and S3b. (c) At 2 K. (d) At 10 K.

At 2 K and 10 K, Hall resistance with respect to magnetic field ( $R_{xy}-H$ ) results for  $x=0.14, 0.28$  and  $0.42$  are shown in Fig. S3, the film thickness are all 30 nm. When  $x=0.14$ , the  $R_{xy}-H$  is linear because of solely  $d_{xy}$  conduction. When  $x=0.28$  and  $0.42$ , the samples both show unlinear  $R_{xy}-H$  curves. The former can be attributed to abnormal Hall effect (AHE), while the latter one can be the results of AHE and dual-channel carriers.

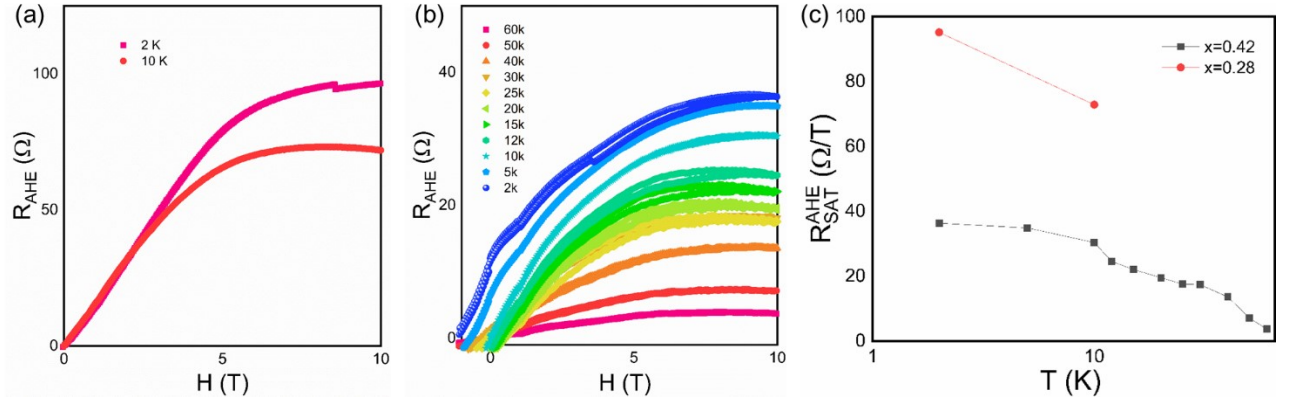

Figure S4. Abnormal Hall resistance ( $R_{AHE}$ ) extracted from nonlinear  $R_{xy}$ - $H$  results for (a)  $x=0.28$  and (b)  $x=0.42$ . (c) Saturation abnormal Hall resistance as a function of temperature ( $R_{AHE}$ - $T$ ) extracted from Fig. S4(a) and (b).

The  $R_{AHE}$  results for  $x=0.28$  and  $0.42$  samples with respect to magnetic field are extracted from nonlinear  $R_{xy}$ - $H$  results after their linear part is deduced. The step-like feature is obvious, while the most dramatic change happens below 5 T. After 5 T, the results tend to become saturated.

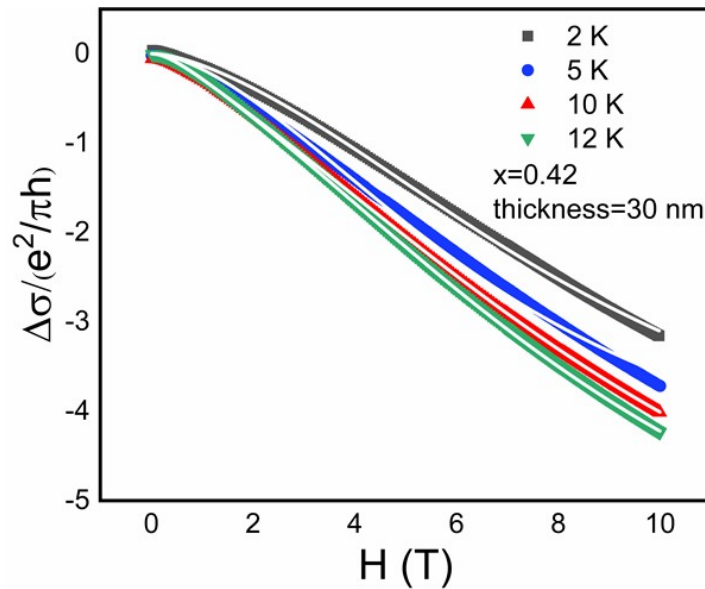

Figure S5.  $[\Delta\sigma(H)/G_0]$ - $H$  results and Maekawa-Fukuyama fitting curves for  $x=0.42$ , thickness=30 nm sample at 2 K, 5 K, 10 K and 12 K.

According to Fig. S5, the  $[\Delta\sigma(H)/G_0]-H$  relationship and Maekawa-Fukuyama fitting results are well fitted, thus allows for further analysis based on Maekawa-Fukuyama expression.

### Relative fitting formulas

For  $R_s-T$  results in Fig. 2(b), we adopt Hamman model of Kondo effect for further analysis. The formula is shown as follows:

$$R_s(T) = R_0 + AT^2 + BT^5 + R_K(T/T_K) \quad (S1)$$

Here, the  $R_0$  is the residual resistance, the  $AT^2$  describes the electron-electron scattering and  $BT^5$  originates from electron-phonon interaction dependent resistance, while the last part is Kondo term, and can be expressed as follows:

$$R_K(T/T_K) = C \left( 1 - \frac{\ln(T/T_K)}{\sqrt{(\ln(T/T_K))^2 + \pi^2(S(S+1))}} \right) \quad (S2)$$

Among the equation,  $C$  is a relative constant term,  $T_K$  means the effective Kondo temperature, and  $S$  is the effective spin of magnetic scattering center. As the fitting curves shows good consistency with  $R_s-T$  results in Fig. 2b, the variation of different fitting factors with respect to different samples are listed in Table S1.

Table S1. Fitting factors for  $R_s-T$  results of different NSAMO/STO samples shown in Fig. (2b)

by using equation (S1) and (S2).

| Sample | $R_0$ ( $\Omega/\square$ ) | A                        | B                        | C ( $\Omega/\square$ ) | $T_K$ (K) | S (a.u.) |
|--------|----------------------------|--------------------------|--------------------------|------------------------|-----------|----------|
|        |                            | ( $\Omega/\square K^2$ ) | ( $\Omega/\square K^5$ ) |                        |           |          |

|            |          |       |                        |         |        |       |
|------------|----------|-------|------------------------|---------|--------|-------|
| 0.14, 20nm | 2381.631 | 0.503 | 6.599*10 <sup>-8</sup> | 924.822 | 12.224 | 0.090 |
| 0.14, 30nm | 956.828  | 0.052 | 1.964*10 <sup>-9</sup> | 298.081 | 70.516 | 0.063 |
| 0.28, 30nm | 1861.064 | 0.615 | 8.547*10 <sup>-9</sup> | 277.446 | 9.651  | 0.046 |
| 0.42, 30nm | 655.408  | 0.212 | 3.662*10 <sup>-9</sup> | 117.272 | 10.460 | 0.029 |

According to Table S1, the lattice disorder is enhanced in some aspects as the  $A$  and  $B$  order arrives a higher value, and the  $T_K$  tends to get smaller first as the  $x$  increases but will get relatively steady as the  $x$  continue to grow up.

For fitting of two types of carriers based on results in Fig. 4(a), we adopt a dual-channel carriers formula, which can be expressed as follows:

$$R_{xy} = \frac{H(n_1\mu_1^2 + n_2\mu_2^2) + H(\mu_1\mu_2H)^2(n_1 + n_2)}{e(n_1\mu_1 + n_2\mu_2)^2 + e(\mu_1\mu_2H)^2(n_1 + n_2)^2} \quad (\text{S3})$$

$$R_S(0) = \frac{1}{e(n_1\mu_1 + n_2\mu_2)} \quad (\text{S4})$$

Where  $n_1$  and  $n_2$  means the carrier density of different carriers,  $\mu_1$  and  $\mu_2$  represents corresponding mobility, and  $H$  is the magnetic field. Formula (S3) is restricted by Formula (S4).
